# Supplementary material for: Canopy and Ear Traits Associated With Avoidance of Fusarium Head Blight in Wheat
Source: Front Plant Sci. 2018 Jul 31;9:1021. doi: 10.3389/fpls.2018.01021 (PMC6079624; doi:10.3389/fpls.2018.01021)
Supplement: Supplementary Table 1 — Trait means for genotypes from individual experiments. [file Table_1.xls]

## Sheet: field experiments 2010&11
Year	Genotype	AUDPC	AUDPC sqrt	FLL	PH	FLW	EL	SE	TN	SD	logFg	logFc	logFp	logFa	logFl	logMm	logMn	Back Transformed Fg	Back Transformed Fc	Back Transformed Fp	Back Transformed Fa	Back Transformed Fl	log DON	LogHT2+T2	logZON	Back Transformed DON	Back Transformed HT2+T2	Back Transformed ZON
2010	Ambrosia	24.5	4.47	14.67	66.37	1.6167	8.633	19.23	6.6	2.2281	-1.032	-1.175	-1.493	-2.034	-1.119	-1.8169	-2.5199	0.0928966	0.0668344	0.0321366	0.00924698	0.0760326	3.052	2.224	1.361	1127.2	167.494	22.9615
2010	Claire	19.2	4.04	14.3	72.55	1.59	9.733	21.47	6.767	2.2066	-3.15	-3.165	-1.541	-2.704	-2.023	-3.3541	-2.8487	0.000707946	0.000683912	0.028774	0.00197697	0.00948418	2.42	2.007	1.078	263.027	101.625	11.9674
2010	Grafton	6.8	2.52	13.77	57.9	1.5633	7.617	17.2	6.7	2.2624	-2.354	-4	-1.59	-1.958	-1.508	-3.4199	-1.9617	0.00442588	0.0001	0.025704	0.0110154	0.0310456	2.126	1.804	1	133.66	63.6796	10
2010	Rialto	34.7	5.77	12.45	61.84	1.64	8.25	19.87	6.9	2.4096	-1.365	-2.339	-1.349	-2.575	-1.377	-3.3338	-2.4996	0.0431519	0.00458142	0.0447713	0.00266073	0.0419759	2.842	1.975	1.201	695.024	94.4061	15.8855
2010	Solstice	24.6	4.73	15.48	73.82	1.93	9.85	19.6	5.2	1.9899	-1.592	-3.167	-2.589	-4	-1.57	-2.7304	-4	0.0255859	0.000680769	0.00257632	0.0001	0.0269153	2.635	1.742	1.124	431.519	55.2077	13.3045
2010	#14	58	7.42	15.84	61.33	1.605	9.05	19.6	4	2.1662	-1.461	-0.589	-2.549	-2.371	-2.455	-3.3737	-2.3886	0.0345939	0.257632	0.00282488	0.00425598	0.00350752	2.638	1.704	1.093	434.51	50.5825	12.388
2010	#16	109	10.37	17.17	67.79	1.7833	8.727	18.33	5.167	2.1029	-1.489	-0.875	-1.887	-2.045	-2.743	-3.2343	-3.2545	0.032434	0.133352	0.0129718	0.00901571	0.00180717	2.645	1.353	1.066	441.57	22.5424	11.6413
2010	#18	262.3	16.12	17.21	50.63	1.44	8.683	18.53	5.767	2.1388	-1.8	-1.193	-2.614	-1.967	-2.775	-3.1575	-4	0.0158489	0.064121	0.0024322	0.0107895	0.0016788	2.021	1.391	1	104.954	24.6037	10
2010	#21	75.8	8.46	17.23	80.4	1.9283	11.513	19.47	4.1	1.6903	-1.779	-2.169	-1.479	-3.248	-3.391	-2.6209	-3.1913	0.0166341	0.00677642	0.0331894	0.000564937	0.000406443	2.008	1.771	1.026	101.859	59.0201	10.617
2010	#24	48.1	6.92	14.7	71.61	1.6233	8.267	19.07	5.667	2.3253	-2.137	-1.494	-2.085	-2.7	-2.364	-3.2737	-4	0.00729458	0.0320627	0.00822243	0.00199526	0.00432514	2.021	1.663	1	104.954	46.0257	10
2010	#38	48.1	6.9	14.96	86.48	1.2133	9.55	19.6	6.667	2.0524	-1.898	-3.201	-2.588	-2.676	-1.661	-4	-3.5558	0.0126474	0.000629506	0.00258226	0.00210863	0.0218273	2.045	1.529	1.116	110.917	33.8065	13.0617
2010	#39	38.4	6.03	16.9	66.32	1.5867	10.9	20.53	6.167	1.8852	-1.435	-0.915	-1.858	-3.233	-2.319	-2.6178	-2.5364	0.0367282	0.121619	0.0138676	0.00058479	0.00479733	2.656	1.909	1.189	452.898	81.0961	15.4525
2010	#51	55.3	6.6	17.24	67.74	1.9333	9.63	17.8	5.167	1.8494	-2.667	-1.031	-4	-1.952	-2.549	-2.6962	-3.1828	0.00215278	0.0931108	0.0001	0.0111686	0.00282488	2.23	1.021	1	169.824	10.4954	10
2010	#61	25.8	4.24	18.37	95.58	1.8867	12.943	19.77	5.833	1.5264	-2.555	-4	-1.834	-3.331	-2.34	-4	-3.4848	0.00278612	0.0001	0.0146555	0.000466659	0.00457088	2.228	1.885	1	169.044	76.7361	10
2010	#77	64	7.76	15.44	81.38	1.7217	9.767	20	6.733	2.0493	-2.694	-2.226	-3.316	-2.799	-2.971	-4	-3.3143	0.00202302	0.00594292	0.000483059	0.00158855	0.00106905	2.051	1.34	1	112.46	21.8776	10
2011	Ambrosia	5	2.23	15.69	70.39	1.7633	9.973	21.27	2	2.133	-2.262	-4	-1.6	-2.634	-1.686	-3.3791	-3.4321	0.00547016	0.0001	0.0251189	0.00232274	0.0206063	1.614	1.122	1	41.115	13.2434	10
2011	Claire	7.3	2.57	16.69	74.13	1.7233	11.26	26.33	2	2.3394	-3.091	-4	-1.682	-2.719	-3.186	-4	-4	0.000810961	0.0001	0.020797	0.00190985	0.000651628	1.29	1.105	1	19.4984	12.735	10
2011	Grafton	4.6	2.04	15.09	61.06	1.5933	9.34	19.6	2.867	2.0986	-4	-3.067	-2.724	-2.727	-2.585	-4	-4	0.0001	0.000857038	0.00188799	0.00187499	0.00260016	1.53	1.141	1	33.8844	13.8357	10
2011	Rialto	4.1	2.02	15.96	77.73	1.77	10.9	25.27	1.4	2.319	-3.235	-4	-2.569	-2.547	-2.995	-3.4256	-4	0.000582103	0.0001	0.00269774	0.00283792	0.00101158	1.141	1.016	1.043	13.8357	10.3753	11.0408
2011	Solstice	6.6	2.46	15.93	77.83	1.75	10.193	21.07	1.8	2.0689	-3.303	-2.196	-1.401	-2.964	-2.694	-4	-3.4813	0.000497737	0.00636796	0.0397192	0.00108643	0.00202302	1.664	1.028	1	46.1318	10.666	10
2011	#14	13.7	3.61	12.84	66.8	1.28	9.393	21.067	1.33	2.2467	-4	-2.464	-1.888	-2.589	-2.262	-4	-4	0.0001	0.00343558	0.012942	0.00257632	0.00547016	1.04	1.071	1	10.9648	11.7761	10
2011	#16	41	6.28	17.39	72.87	1.5267	9.82	21.13	2	2.1517	-4	-1.268	-1.411	-2.508	-2.849	-4	-4	0.0001	0.0539511	0.038815	0.00310456	0.00141579	2.142	1.006	1	138.676	10.1391	10
2011	#18	41.8	6.45	20.79	40.02	1.58	9.247	19.6	1.667	2.1169	-4	-4	-1.608	-2.454	-1.715	-4	-4	0.0001	0.0001	0.0246604	0.0035156	0.0192752	1.061	1.101	1	11.508	12.6183	10
2011	#21	16.2	4.01	21.27	106.86	1.5333	13.407	24.07	1.667	1.7982	-3.293	-4	-2.372	-2.692	-2.667	-4	-3.5289	0.000509331	0.0001	0.0042462	0.00203236	0.00215278	1.121	1	1	13.213	10	10
2011	#24	16.6	4.01	14.09	79.16	1.4	9.647	22.87	2	2.3729	-2.517	-3.299	-1.123	-2.894	-1.891	-4	-4	0.00304089	0.000502343	0.0753356	0.00127644	0.0128529	1.308	1.284	1	20.3236	19.2309	10
2011	#38	2.6	1.49	14.49	90.44	1.2633	10.9	24.2	2.067	2.2193	-4	-4	-3.245	-2.572	-3.364	-4	-4	0.0001	0.0001	0.000568853	0.00267917	0.000432514	1	1	1	10	10	10
2011	#39	4.3	2.06	15.46	58.14	1.7	9.667	24.4	1.467	2.5304	-4	-4	-2.548	-2.801	-2	-4	-3.5577	0.0001	0.0001	0.00283139	0.00158125	0.01	1.126	1	1	13.366	10	10
2011	#51	4.2	1.94	17.81	76.97	1.88	11.653	21.27	2.267	1.8249	-4	-4	-1.928	-2.143	-4	-4	-3.6917	0.0001	0.0001	0.0118032	0.00719449	0.0001	1.061	1	1	11.508	10	10
2011	#61	3.2	1.76	19.04	118.41	1.54	13.02	21.2	1.667	1.6282	-3.332	-4	-1.849	-2.848	-4	-4	-4	0.000465586	0.0001	0.0141579	0.00141906	0.0001	1.217	1	1	16.4816	10	10
2011	#77	2	1.4	16.61	116	1.5067	12.77	23.67	1.6	1.862	-4	-4	-2.099	-2.722	-3.438	-4	-4	0.0001	0.0001	0.00796159	0.00189671	0.000364754	1	1	1	10	10	10

## Sheet: 2012 line 8DH population
Genotype	AUDPC	sqrtAUDPC	FLL	PH	FLW	EL	SE	TN	SD
1	963.5	31.0403	15.19	84.65	1.427	10.37	21.53	2.933	2.07618
2	1318.3	36.3084	15.86	84.97	1.533	9.81	21.67	3.2	2.20897
3	1024.3	32.0047	15.26	81.15	1.44	10.59	22.33	2.733	2.10859
4	136.3	11.6748	16.55	81.33	1.407	11.51	20.4	2.667	1.77237
5	841.3	29.0052	21.26	74.3	2.037	10.22	22.6	3.937	2.21135
6	669.2	25.8689	14.93	59.41	1.483	9.74	21.67	5.833	2.22485
7	1729.8	41.5909	18.35	64.77	1.6	9.99	21.67	3.467	2.16917
8	483.2	21.9818	17.97	79.99	1.593	12.08	22.67	2.533	1.87666
9	1235.8	35.1539	16.28	70.35	1.767	11.01	22.73	2.4	2.06449
10	494.7	22.2419	19.52	81.67	1.64	10.62	20.87	2.4	1.96516
11	624.9	24.998	20.21	77.67	1.917	10.68	22.13	3.62	2.0721
12	816.4	28.5727	19.09	94.99	1.733	12.21	23.33	3.333	1.91073
13	479.7	21.9021	17.54	77.46	1.487	11.35	21.93	3.133	1.93216
14	1036.5	32.1947	17.63	65.93	1.683	9.79	21.53	3.767	2.19918
15	741.3	27.2268	13.23	58.57	1.487	9.55	23.87	2.867	2.49948
16	608.6	24.6698	17.21	69.69	1.6	10.74	20.47	3.533	1.90596
17	837.4	28.9379	22.47	88.17	2.033	11.37	21.47	3.667	1.8883
18	320.4	17.8997	16.57	91.87	1.527	11.87	21.8	3.4	1.83656
19	379.7	19.4859	16.78	75.43	1.693	10.57	22.07	2.733	2.08798
20	1445.7	38.0224	19.55	87.94	1.707	10.67	22.4	3.333	2.09934
21	868	29.4618	15.51	63.56	1.533	9.81	22.87	2.867	2.33129
22	1299.5	36.0486	15.38	83.67	1.56	9.49	23	3.067	2.4236
23	1144.9	33.8364	13.37	67.07	1.443	9.99	21.8	3.075	2.18218
24	821.3	28.6583	17.39	81.89	1.567	11.99	20.67	3.6	1.72394
25	867.5	29.4534	16.04	78.85	1.52	10.22	20.6	3.533	2.01566
26	931.6	30.5221	16.19	91.06	1.393	11.14	22.8	3.733	2.04668
27	734	27.0924	22.07	76.55	2.057	10.9	21.27	3.8	1.95138
28	428.1	20.6906	19.91	76.58	1.613	11.65	22.47	3.667	1.92876
29	452.4	21.2697	16.43	87.52	1.73	11.18	20.8	3.2	1.86047
30	163.5	12.7867	17.03	106.29	1.58	12.73	23.4	2.857	1.83818
32	1142.9	33.8068	19.09	54.57	1.893	10.19	22.07	6.2	2.16585
33	1464.3	38.2662	16.61	73.97	1.573	9.85	23.73	2.867	2.40914
34	105.7	10.2811	15.04	71.74	1.573	11.26	22.13	3.2	1.96536
35	995.3	31.5484	13.91	75.05	1.553	9.99	22.47	2.867	2.24925
37	458.3	21.4079	16.53	62.85	1.653	10.21	21.33	2.6	2.08913
38	720	26.8328	16.49	82.32	1.533	11.18	23.53	2.933	2.10465
39	1047.7	32.3682	15.69	65.15	1.613	9.28	22.6	3.333	2.43534
40	628	25.0599	15.65	72.71	1.587	9.41	22.53	2.667	2.39426
42	740.4	27.2103	18.36	85.62	1.567	9.43	22.13	2.6	2.34677
43	399	19.975	15.8	68.84	1.487	9.37	21.67	2.867	2.3127
44	1464.9	38.274	15.95	74.11	1.487	11.18	22.8	3.533	2.03936
45	1225.4	35.0057	16.82	66.93	1.78	10.48	21.8	2.333	2.08015
46	942.7	30.7034	15.24	69.42	1.567	10.17	21.27	2.2	2.09145
47	1215.9	34.8698	15.68	73.09	1.507	10.25	21.53	3.467	2.10049
48	582.3	24.1309	17.51	79.59	1.653	11.37	22.27	3.533	1.95866
49	865.7	29.4228	19.59	60.16	1.857	10.6	22.8	2.633	2.15094
50	649	25.4755	17.89	83.34	1.613	10.41	19.73	2.6	1.89529
51	92.1	9.59687	20.29	87.73	1.667	11.85	20	2.8	1.68776
52	850.8	29.1685	17.79	76.92	1.527	10.07	19.47	3.4	1.93347
53	174.8	13.2212	18.65	96.51	1.617	12.93	24.33	2.633	1.88167
54	627.7	25.0539	21.2	89.03	1.777	12.38	21.67	3.733	1.7504
55	633	25.1595	15.16	71.34	1.593	10.36	22.27	2.867	2.14961
56	706.7	26.5838	18.05	94.95	1.627	12.11	22.93	2.933	1.89348
57	1127.9	33.5842	17.04	83.18	1.4	10.26	19.2	3.4	1.87135
58	1274.9	35.7057	15.15	63.67	1.733	9.83	22.73	2.6	2.31231
59	869.4	29.4856	20.83	74.69	1.553	9.91	21.87	3.533	2.20686
60	949.2	30.8091	14.91	86.15	1.453	10.17	22.33	2.667	2.19567
61	84.3	9.1815	16	99.87	1.46	11.84	25.4	1.9	2.14527
62	178.4	13.3566	18.1	83.27	1.767	12.39	21.47	2.667	1.73285
63	842.7	29.0293	19.53	86.31	1.507	11.08	22	3	1.98556
64	148.8	12.1984	17.32	77.9	1.663	10.04	22.07	3.267	2.19821
65	1168	34.176	18.03	97.29	1.573	11.08	23	3.2	2.07581
66	500.6	22.3741	22.6	92.95	1.74	12.71	22.33	3.833	1.75688
67	483.6	21.9909	17.54	79.69	1.567	10.48	22.07	2.267	2.10592
68	772.9	27.8011	18.23	89.01	1.607	9.91	21.6	2.933	2.17962
69	519.7	22.7969	15.79	81.01	1.58	10.85	21.87	3.6	2.01567
70	113.3	10.6442	16.73	88.26	1.413	11.46	22.73	5.167	1.98342
71	969.1	31.1304	18.21	72.13	1.553	10.15	23.2	2.6	2.28571
72	449.7	21.2061	15.2	81.35	1.64	11.24	21.97	2.867	1.95463
73	458.3	21.4079	19.41	69.86	1.547	11.11	22.6	2.533	2.0342
74	576.5	24.0104	14.97	95.18	1.52	10.89	22.47	3	2.06336
75	574.6	23.9708	17.03	97.7	1.527	11.35	21.6	2.467	1.90308
76	960.7	30.9952	18.37	71.67	1.87	9.57	22.6	4.333	2.36155
77	1391.3	37.3001	15.43	56.89	1.707	9.92	23.33	3.133	2.35181
78	832	28.8444	14.63	88.9	1.42	9.94	22.2	2.667	2.2334
79	552.2	23.4989	14.83	48.61	1.707	9.93	22	3.767	2.21551
80	888.8	29.8127	22.17	86.03	1.917	10.65	23.6	2.8	2.21596
82	175.5	13.2476	19.13	89.37	1.52	11.7	19.6	3.267	1.67521
83	671.2	25.9075	16.04	78.23	1.44	10.01	21.6	2.933	2.15784
84	1311.5	36.2146	17.35	92.53	1.62	9.89	22.53	3.267	2.27806
85	152	12.3288	14.17	51.14	1.63	9.97	24.07	3.967	2.41424
86	457.8	21.3963	21.73	101.66	1.907	10.66	18.27	4.333	1.71388
87	1010.9	31.7947	14.2	71.95	1.513	9.41	21.53	2.8	2.28799
88	950.9	30.8367	18.67	72.15	1.553	9.7	23.13	4.333	2.38454
Line8	309.7	17.5983	20.15	84.43	1.833	12.68	22.53	4.633	1.77681
Rialto	799.4	28.2737	19.29	78.95	1.857	10.65	25.27	3.4	2.37277

## Sheet: 2012 line 8DH selected _DNA_Tox
Line	AUDPC	AUDPC sqrt	FLL	PH	FLW	EL	SE	TN	SD	logFg	logFc	logMm	logMn	Back Transformed Fg	Back Transformed Fc	Back Transformed Mm	Back Transformed Mn	DON µg/kg	ZON µg/kg	DON Log10	ZON Log10
#4	136	11.6619	16.55	81.3	1.407	11.51	20.4	2.667	1.77237	-1.167	-1.498	-1.207	-1.301	0.0680769	0.0317687	0.0620869	0.0500035	250.103	97	2.39812	1.98677
#5	841	29	21.26	74.3	2.037	10.22	22.6	3.937	2.21135	0.212	0.06	0.118	-0.112	1.6293	1.14815	1.3122	0.772681	684	755	2.83506	2.87795
#6	669	25.865	14.93	59.4	1.483	9.74	21.67	5.833	2.22485	-1.035	-1.114	-1.248	-1.335	0.0922571	0.076913	0.0564937	0.0462381	101	45	2.00432	1.65321
#11	625	25	19.47	77.7	1.917	10.68	22.13	3.62	2.0721	-1.184	-1.222	-0.634	-1.857	0.0654636	0.0599791	0.232274	0.0138995	971	11.1899	2.98722	1.04883
#14	1037	32.2025	17.83	65.9	1.683	9.79	21.53	3.767	2.19918	0.076	-0.08	0.106	0.07	1.19124	0.831764	1.27644	1.1749	651.51	247	2.81392	2.3927
#17	837	28.931	22.77	88.2	2.033	11.37	21.47	3.667	1.8883	0.053	-0.045	0.04	0.07	1.1298	0.901571	1.09648	1.1749	681	200	2.83315	2.30103
#27	734	27.0924	22.87	76.6	2.057	10.9	21.27	3.8	1.95138	0.322	0.274	-0.139	-1.753	2.09894	1.87932	0.726106	0.0176604	1297	599	3.11294	2.77743
#29	452	21.2603	16.43	87.5	1.73	11.18	20.8	3.2	1.86047	-0.029	-0.708	-0.051	-1.88	0.935406	0.195884	0.889201	0.0131826	300	249	2.47712	2.3962
#30	163	12.7671	17.03	106.3	1.58	12.73	23.4	2.857	1.83818	-0.536	-0.569	-0.143	0.013	0.291072	0.269774	0.719449	1.03039	198	268	2.29667	2.42813
#32	1143	33.8083	19.59	54.6	1.893	10.19	22.07	6.2	2.16585	0.441	0.267	0.243	-1.099	2.76058	1.84927	1.74985	0.0796159	1205	110	3.08099	2.04139
#34	106	10.2956	15.04	71.7	1.573	11.26	22.13	3.2	1.96536	0.101	0.103	0.065	-1.285	1.26183	1.26765	1.16145	0.05188	1394	103	3.14426	2.01284
#49	866	29.4279	19.59	60.2	1.857	10.6	22.8	2.633	2.15094	0.293	0.219	0.248	0.218	1.96336	1.65577	1.77011	1.65196	600	100	2.77815	2
#51	92	9.59166	20.29	87.7	1.667	11.85	20	2.8	1.68776	-1.067	-0.642	-1.606	-1.417	0.0857038	0.228034	0.0247742	0.0382825	611	114.131	2.78604	2.0574
#53	175	13.2288	18.65	96.5	1.617	12.93	24.33	2.633	1.88167	-0.405	-1.122	-1.301	-1.184	0.39355	0.0755092	0.0500035	0.0654636	620	335	2.79239	2.52504
#54	628	25.0599	21.2	89	1.777	12.38	21.67	3.733	1.7504	-0.427	-0.264	-0.707	-1.73	0.374111	0.544503	0.196336	0.0186209	579.363	524	2.76295	2.71933
#59	869	29.4788	20.83	74.7	1.553	9.91	21.87	3.533	2.20686	0.182	0.153	0.221	0.058	1.52055	1.42233	1.66341	1.14288	900	387	2.95424	2.58771
#61	84	9.16515	16	99.9	1.46	11.84	25.2	1.9	2.12838	-1.153	-1.988	-1.472	-0.988	0.0703072	0.0102802	0.0337287	0.102802	304	116	2.48287	2.06446
#62	178	13.3417	18.1	83.3	1.767	12.39	21.47	2.667	1.73285	-0.426	-1.202	-1.053	-1.233	0.374973	0.0628058	0.0885116	0.058479	1170	855	3.06819	2.93197
#64	149	12.2066	17.32	77.9	1.663	10.04	22.07	3.267	2.19821	-0.9	-1.64	-1.044	-0.658	0.125893	0.0229087	0.0903649	0.219786	999	110	2.99957	2.04139
#66	501	22.383	22.6	93	1.74	12.71	22.33	3.833	1.75688	-0.301	-1.893	-0.768	-1.447	0.500035	0.0127938	0.170608	0.0357273	879	228	2.94399	2.35793
#70	113	10.6301	16.73	88.3	1.413	11.46	22.73	5.167	1.98342	-1.222	-2.049	-1.898	-0.96	0.0599791	0.00893305	0.0126474	0.109648	451	25.8108	2.65418	1.4118
#76	961	31	18.37	71.7	1.87	9.57	22.6	4.333	2.36155	0.142	-0.077	0.048	0.021	1.38676	0.837529	1.11686	1.04954	858	281	2.93349	2.44871
#79	552	23.4947	14.83	48.6	1.707	9.93	22	3.767	2.21551	-0.394	-1.366	-1.059	-1.248	0.403645	0.0430527	0.0872971	0.0564937	414	381	2.617	2.58092
#80	889	29.8161	22.17	86	1.917	10.65	23.6	2.8	2.21596	0.282	-1.307	-0.698	-0.471	1.91426	0.0493174	0.200447	0.338065	1045	560	3.01912	2.74819
#82	176	13.2665	19.13	89.4	1.52	11.7	19.6	3.267	1.67521	-1.141	-2.108	-1.693	-1.508	0.072277	0.0077983	0.0202768	0.0310456	268.818	300	2.42946	2.47712
#86	458	21.4009	21.73	101.7	1.907	10.66	18.27	4.333	1.71388	-1.015	-1.591	-0.537	-1.037	0.0966051	0.0256448	0.290402	0.0918333	227	59	2.35603	1.77085
#85	152	12.3288	14.17	51.1	1.63	9.97	24.07	3.967	2.41424	-0.36	-1.933	-1.509	-0.255	0.436516	0.0116681	0.0309742	0.555904	777	206	2.89042	2.31387
#88	951	30.8383	18.67	72.1	1.553	9.7	23.13	4.333	2.38454	0.182	0.303	-0.115	0.173	1.52055	2.00909	0.767361	1.48936	1389	575	3.1427	2.75967
Line8	310	17.6068	20.15	84.4	1.833	12.68	22.53	4.633	1.77681	-0.171	-1.825	-1.739	-0.28	0.674528	0.0149624	0.018239	0.524807	845	777	2.92686	2.89042
Rialto	799	28.2666	19.29	78.9	1.857	10.65	25.27	3.4	2.37277	-0.09	0.02	-0.848	-0.964	0.812831	1.04713	0.141906	0.108643	902	433	2.95521	2.63649

## Sheet: glasshouse experiments 2011&12
Year	Genotype	AUDPC	FLL	PH	FLW	EL	SE	TN	SD	AL	logFg	logFc	logFp	logFa	logFl	Back Transformed Fg	Back Transformed Fc	Back Transformed Fp	Back Transformed Fa	Back Transformed Fl
2011	Ambrosia	21	17.64	68.86	2.038	14.48	25.5	13.24	1.765	0.376	-1.43	0.01	-4	-4	-2.01	0.0371535	1.02329	0.0001	0.0001	0.00977237
2011	Claire	139.7	20.66	69.46	2.25	15.95	28.5	9.99	1.788	0.339	-0.84	0.19	-4	-4	-2.478	0.144544	1.54882	0.0001	0.0001	0.0033266
2011	Frontana	1.1	32.31	118.89	1.85	12.68	17	12.49	1.343	6.164	-1.76	-3.33	-4	-4	-2.709	0.017378	0.000467735	0.0001	0.0001	0.00195434
2011	Rialto	183.7	19.59	75.66	2.125	15.58	29.5	11.24	1.898	0.314	-0.22	0.39	-4	-4	-4	0.60256	2.45471	0.0001	0.0001	0.0001
2011	Sumai-3	15.6	37.64	72.76	1.75	12.2	18.5	5.99	1.518	7.176	-2.68	-2.43	-4	-4	-2.512	0.0020893	0.00371535	0.0001	0.0001	0.0030761
2011	#14	13.1	25.56	77.71	1.888	14	26.25	6.74	1.878	0.371	0.12	-0.39	-3.265	-4	-2.484	1.31826	0.40738	0.00054325	0.0001	0.00328095
2011	#16	56.8	23.59	71.96	1.913	12.48	24.5	10.74	1.968	0.589	-2.17	0.09	-3.335	-4	-3.534	0.00676083	1.23027	0.000462381	0.0001	0.000292415
2011	#18	267.6	27.99	48.81	1.975	14.75	25.5	11.24	1.728	4.551	-2.36	-2.25	-3.029	-4	-2.563	0.00436516	0.00562341	0.000935406	0.0001	0.00273527
2011	#21	115.3	29.69	105.86	2.188	18.58	29.75	7.49	1.608	0.514	-1.13	-0.54	-4	-4	-2.436	0.074131	0.288403	0.0001	0.0001	0.00366438
2011	#24	70.7	22.84	69.96	2.105	13.63	26.75	7.74	1.968	0.401	0.27	-1.44	-2.577	-4	-2.373	1.86209	0.0363078	0.0026485	0.0001	0.00423643
2011	#38	205.3	15.65	92.82	1.501	15	29	12.33	1.934	4.917	-2.98	-2.31	-3.06	-4	-2.359	0.00104713	0.00489779	0.000870964	0.0001	0.00437522
2011	#39	66.7	30.51	52.03	2.317	19.87	26.34	9.01	1.327	6.383	0.23	-0.78	-3.016	-4	-1.866	1.69824	0.165959	0.000963829	0.0001	0.0136144
2011	#51	14.7	17.71	65.14	2.25	16.5	26.75	10.24	1.625	5.026	-1.88	-1.52	-4	-4	-3.509	0.0131826	0.0301995	0.0001	0.0001	0.000309742
2011	#61	103.2	35.66	109.29	2.575	20.08	31.25	2.99	1.57	4.376	-0.82	-2.84	-4	-4	-3.084	0.151356	0.00144544	0.0001	0.0001	0.000824138
2011	#77	118	25.14	107.59	2.25	17.38	30	5.74	1.728	0.414	-2.13	-2.26	-3.244	-4	-2.431	0.0074131	0.00549541	0.000570164	0.0001	0.00370681
2012	Ambrosia	335.8	36.59	67.95	2.734	15.24	27.33	17.33	1.824	2.936	-0.2	0.12	-4	-1.987	-3.236	0.630957	1.31826	0.0001	0.0103039	0.000580764
2012	Claire	410.4	32.41	76.91	2.575	16.23	31.75	17.49	1.958	0.351	-2.54	-0.21	-4	-1.362	-3.616	0.00288403	0.616595	0.0001	0.043451	0.000242103
2012	Frontana	110.4	34.16	130.81	2.213	14.95	20.25	14.24	1.355	5.489	-0.87	-0.21	-3.273	-1.746	-2.561	0.134896	0.616595	0.000533335	0.0179473	0.00274789
2012	Rialto	378.6	35.34	77.06	2.988	17.05	31.5	18.74	1.85	0.564	-1.05	0.64	-3.367	-1.752	-4	0.0891251	4.36516	0.000429536	0.0177011	0.0001
2012	Sumai-3	31	42.09	83.46	2.038	12.65	20.5	5.49	1.623	7.276	-2.24	0.2	-4	-1.336	-4	0.0057544	1.58489	0.0001	0.0461318	0.0001
2012	#14	54	30.2	76.2	2.3	14	25	6	1.79	0.45	-2.07	-0.02	-2.767	-1.793	-4	0.00851138	0.954993	0.00171002	0.0161065	0.0001
2012	#16	63.5	32.82	79.51	2.584	13.67	27.67	11.33	2.024	0.786	-0.32	0.86	-4	-1.603	-4	0.47863	7.24436	0.0001	0.0249459	0.0001
2012	#18	0	28.91	36.67	2.034	13.24	20.67	5.01	1.553	7.183	-1.27	0.16	-3.597	-0.88	-4	0.0537032	1.44544	0.00025293	0.131826	0.0001
2012	#21	261	38.91	94.09	2.5	17.63	23.5	8.24	1.325	0.476	-2.25	0.41	-4	-1.614	-3.721	0.00562341	2.5704	0.0001	0.024322	0.000190108
2012	#24	259.5	33.26	71.51	2.375	14.15	26	12.99	1.865	0.264	-1.32	0.77	-3.344	-0.993	-3.721	0.047863	5.88844	0.000452898	0.101625	0.000190108
2012	#38	226.5	29.64	89.31	2.063	14.9	28.75	19.99	1.928	5.614	-1.55	-0.15	-4	-2.007	-4	0.0281838	0.707946	0.0001	0.00984011	0.0001
2012	#39	114.7	36.29	49.84	2.863	19.05	25.75	12.99	1.355	8.114	-0.66	0.01	-3.246	-3.111	-3.141	0.218776	1.02329	0.000567545	0.000774462	0.00072277
2012	#51	7.9	38.45	73.7	2.917	17.67	25	10.68	1.417	6.917	-1.52	0.14	-3.389	-1.692	-4	0.0301995	1.38038	0.000408319	0.0203236	0.0001
2012	#61	186	37.86	111.86	2.825	22	27.25	1.74	1.263	6.476	-1.42	0.17	-4	-1.811	-2.52	0.0380189	1.47911	0.0001	0.0154525	0.00301995
2012	#77	163.3	39.11	119.51	3.275	20.65	29.75	7.74	1.445	0.476	-1.28	0.31	-3.558	-1.501	-4	0.0524807	2.04174	0.000276694	0.03155	0.0001
